# Supplementary material for: Interleukin-6 Could Be a Potential Prognostic Factor in Ambulatory Elderly Patients with Stable Heart Failure: Results from a Pilot Study
Source: PubMed Central journal article supplement (PMC7867065; doi:10.3390/jcm10030504), 2021-02-01

## Supplementary material

Box-plot including IL-6 levels and left ventricular ejection fraction

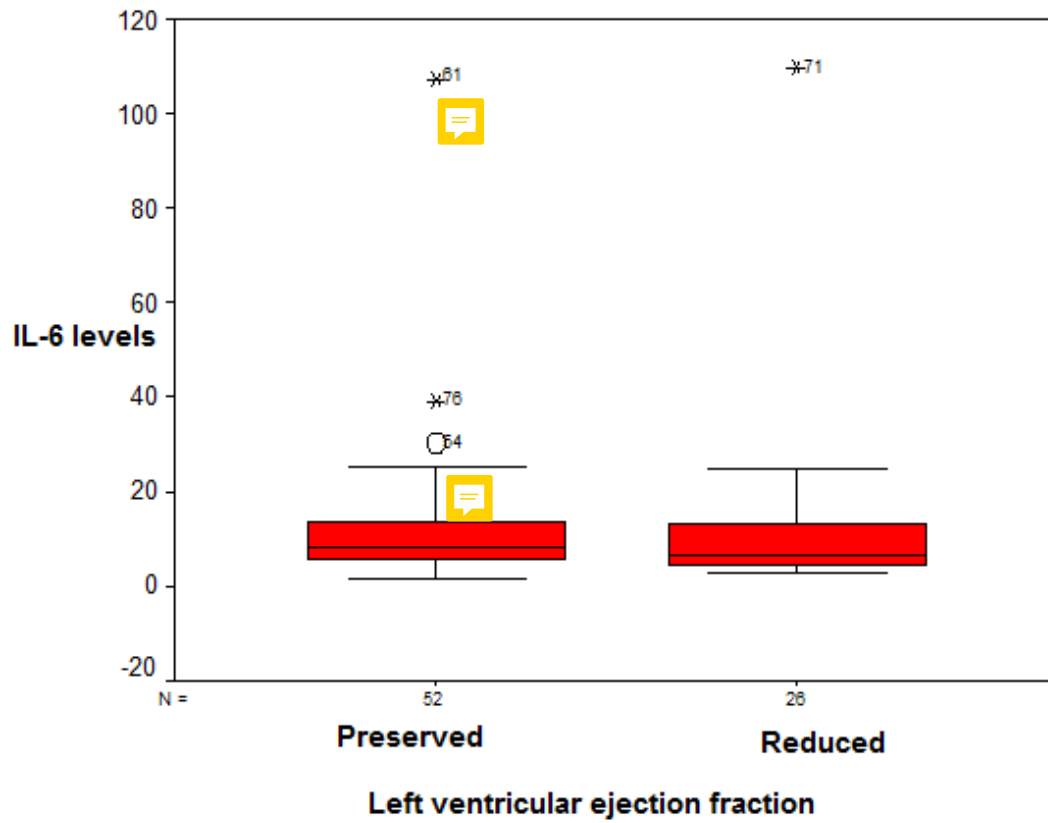

Supplement: jcm-10-00504-s001.pdf [file jcm-10-00504-s001.pdf]
